# Supplementary material for: The VENUSS prognostic model to predict disease recurrence following surgery for non-metastatic papillary renal cell carcinoma: development and evaluation using the ASSURE prospective clinical trial cohort
Source: Springer Nature journal article supplement (doi:10.1186/s12916-019-1419-1), 2019-10-03
Supplement: MOESM2 [file 17236796]

## Supplementary Table 2

Continuous VENUSS score and risk group definitions according to VENUSS group, UISS, TNM group and Leibovich group in the development cohort (A) and the independent ASSURE cohort (B). The coefficients (coeff), standard errors (SE), subhazard ratios (SHR) and confidence intervals (95% CI) are derived from separate competing risks models. In the independent cohort, Rubin's rules were followed to obtain the reported pooled model parameters.

A

|                | Category               | Coeff     | SE    | SHR   | 95% CI     | p      |
|----------------|------------------------|-----------|-------|-------|------------|--------|
| VENUSS score   | Continuous             | 0.485     | 0.046 | 1.62  | 1.48-1.78  | <0.001 |
| VENUSS group   | Low risk               | Reference |       |       |            |        |
|                | Intermediate risk      | 1.58      | 0.361 | 4.85  | 2.38-9.84  | <0.001 |
|                | High risk              | 3.15      | 0.335 | 23.3  | 12.1-45.0  | <0.001 |
| UISS           | Low/intermediate       | Reference |       |       |            |        |
|                | Intermediate high risk | 1.40      | 0.365 | 4.04  | 1.97-8.27  | <0.001 |
|                | Very high risk         | 2.85      | 0.330 | 17.37 | 9.10-33.2  | <0.001 |
| TNM group      | I                      | Reference |       |       |            |        |
|                | II                     | 1.36      | 0.429 | 3.90  | 1.68-9.04  | 0.002  |
|                | III                    | 2.09      | 0.294 | 8.09  | 4.55-14.4  | <0.001 |
|                | IV                     | 4.22      | 0.281 | 68.2  | 39.3-118.1 | <0.001 |
| Leibovich 2018 | Low (group 1)          | Reference |       |       |            |        |
|                | Intermediate (group 2) | 1.11      | 0.412 | 3.03  | 1.35-6.80  | 0.007  |
|                | High (group 3)         | 2.21      | 0.316 | 9.10  | 4.90-16.9  | <0.001 |

B

|                | Category               | Coeff     | SE    | SHR  | 95% CI    | p      |
|----------------|------------------------|-----------|-------|------|-----------|--------|
| VENUSS score   | Continuous             | 0.238     | 0.058 | 1.27 | 1.13-1.42 | <0.001 |
| VENUSS group   | Low/intermediate risk  | Reference |       |      |           |        |
|                | High risk              | 1.11      | 0.28  | 3.04 | 1.75-5.27 | <0.001 |
| UISS           | Intermediate high risk | Reference |       |      |           |        |
|                | Very high risk         | 0.95      | 0.27  | 2.58 | 1.52-4.41 | <0.001 |
| TNM group      | I                      | Reference |       |      |           |        |
|                | II                     | 0.62      | 0.75  | 1.86 | 0.43-8.06 | 0.41   |
|                | III-IV                 | 1.39      | 0.70  | 4.03 | 1.02-16.0 | 0.047  |
| Leibovich 2018 | Low (group 1)          | Reference |       |      |           |        |
|                | Intermediate (group 2) | 0.13      | 0.46  | 1.14 | 0.46-2.80 | 0.78   |
|                | High (group 3)         | 0.68      | 0.37  | 1.97 | 0.96-4.08 | 0.07   |
