# Supplementary material for: The VENUSS prognostic model to predict disease recurrence following surgery for non-metastatic papillary renal cell carcinoma: development and evaluation using the ASSURE prospective clinical trial cohort
Source: Springer Nature journal article supplement (doi:10.1186/s12916-019-1419-1), 2019-10-03

### Supplementary Figure 1

Estimated restricted cubic spline function for tumour size versus the log hazard for tumour recurrence. The risk for recurrence increased after 4 cm and subsequently reached a plateau at 10 cm. We used both cut-offs for further analyses.

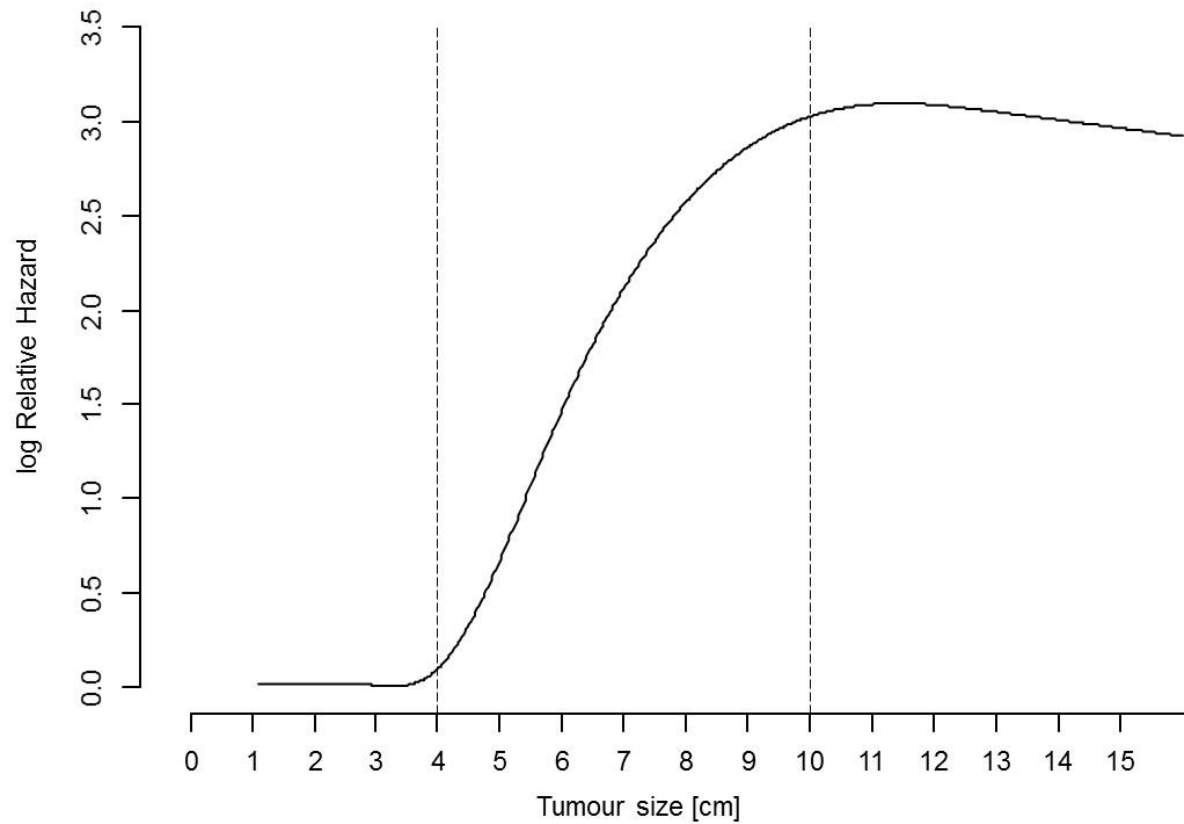

Supplement: MOESM3 [file 17236796]
