# Supplementary material for: The VENUSS prognostic model to predict disease recurrence following surgery for non-metastatic papillary renal cell carcinoma: development and evaluation using the ASSURE prospective clinical trial cohort
Source: Springer Nature journal article supplement (doi:10.1186/s12916-019-1419-1), 2019-10-03

## Supplementary Figure 2

Non-smoothed decision curves of VENUSS and other risk definitions.

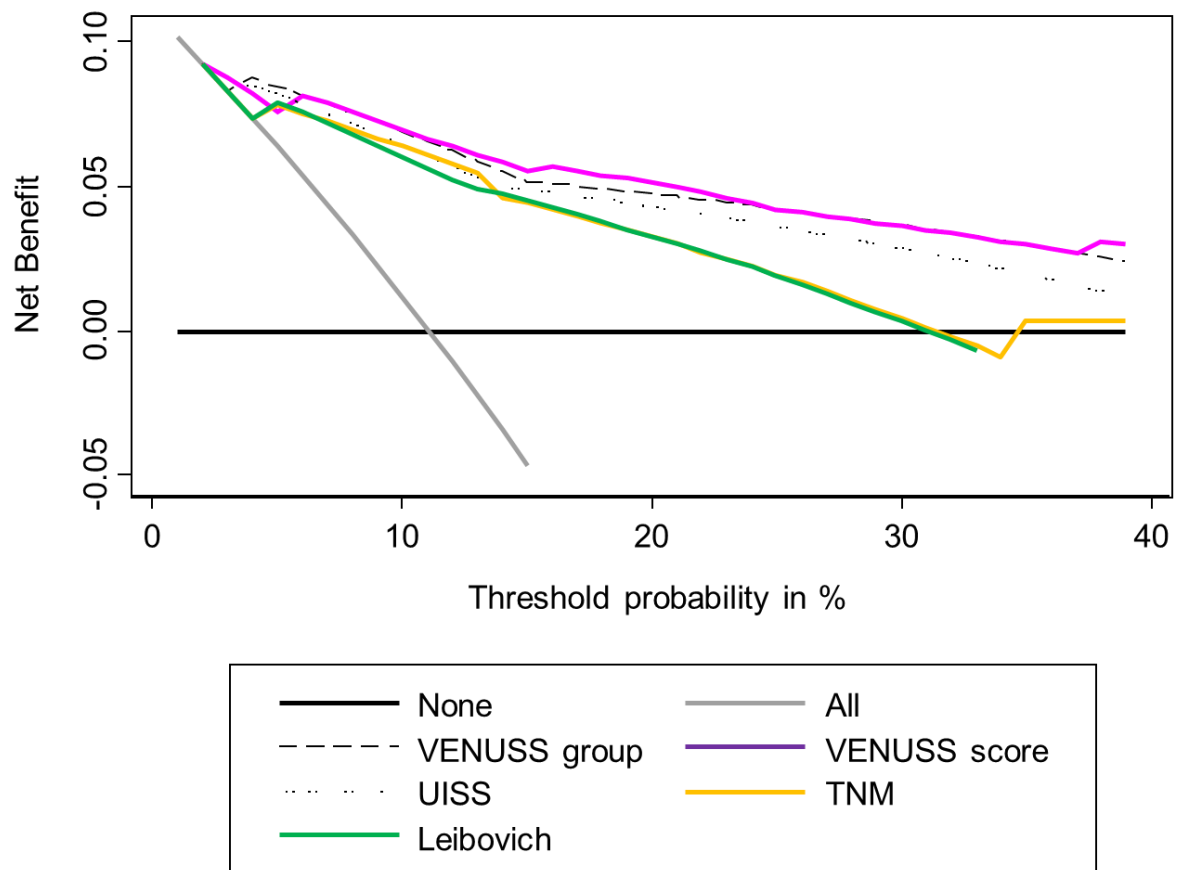

Supplement: MOESM4 [file 17236796]
