# Supplementary material for: The VENUSS prognostic model to predict disease recurrence following surgery for non-metastatic papillary renal cell carcinoma: development and evaluation using the ASSURE prospective clinical trial cohort
Source: Springer Nature journal article supplement (doi:10.1186/s12916-019-1419-1), 2019-10-03
Supplement: MOESM6 [file 17236796]

Supplementary Figure 4

Cumulative incidence of disease recurrence of patients with PRCC recruited into ASSURE according to A – UISS, B – Leibovich group 2018, and C – VENUSS group.

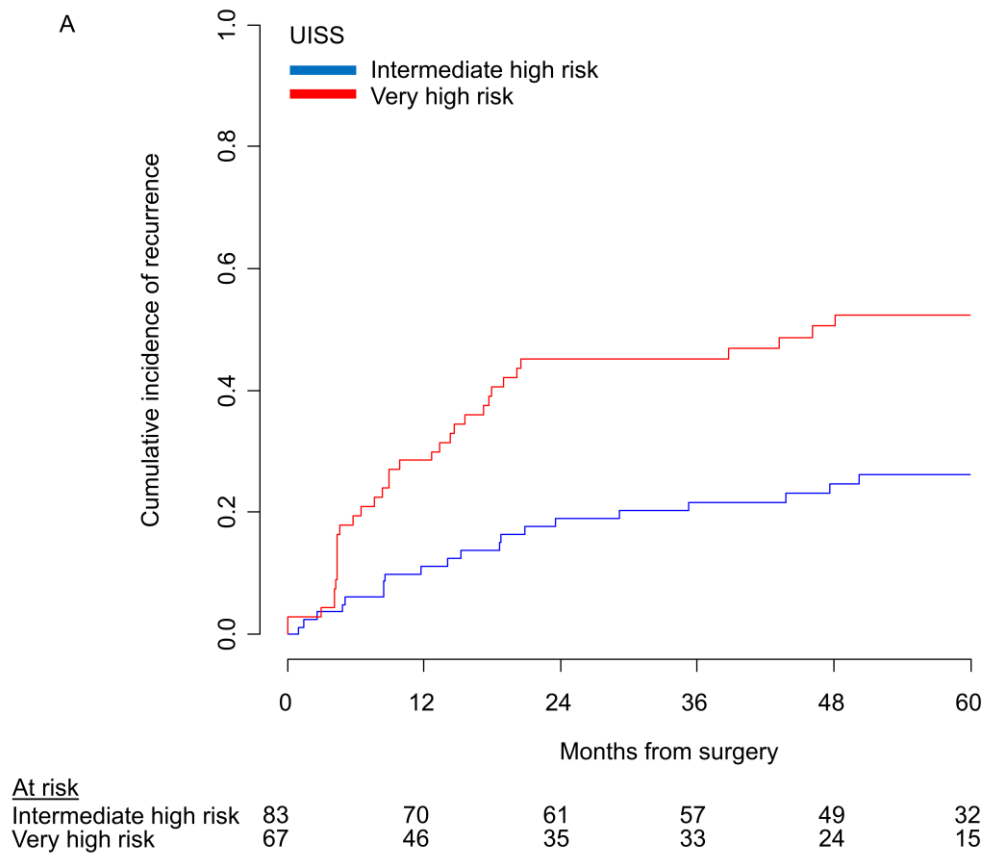

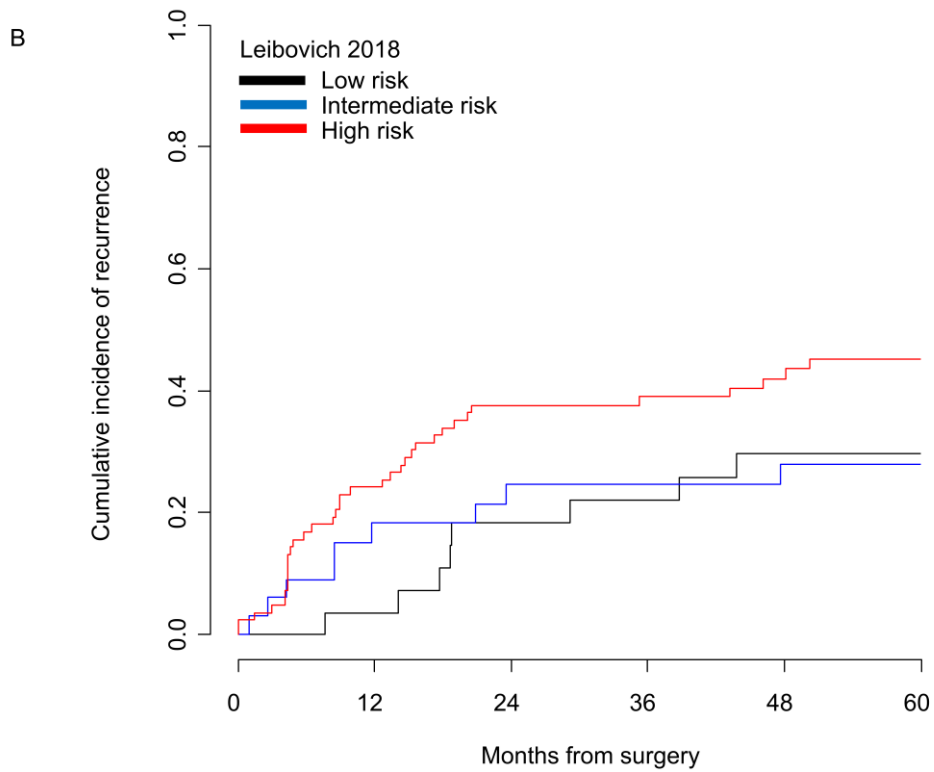

At risk

|                             |    |    |    |    |    |    |
|-----------------------------|----|----|----|----|----|----|
| Low risk (group 1)          | 29 | 27 | 22 | 21 | 16 | 11 |
| Intermediate risk (group 2) | 33 | 26 | 24 | 24 | 20 | 11 |
| High risk (group 3)         | 84 | 61 | 48 | 43 | 36 | 24 |

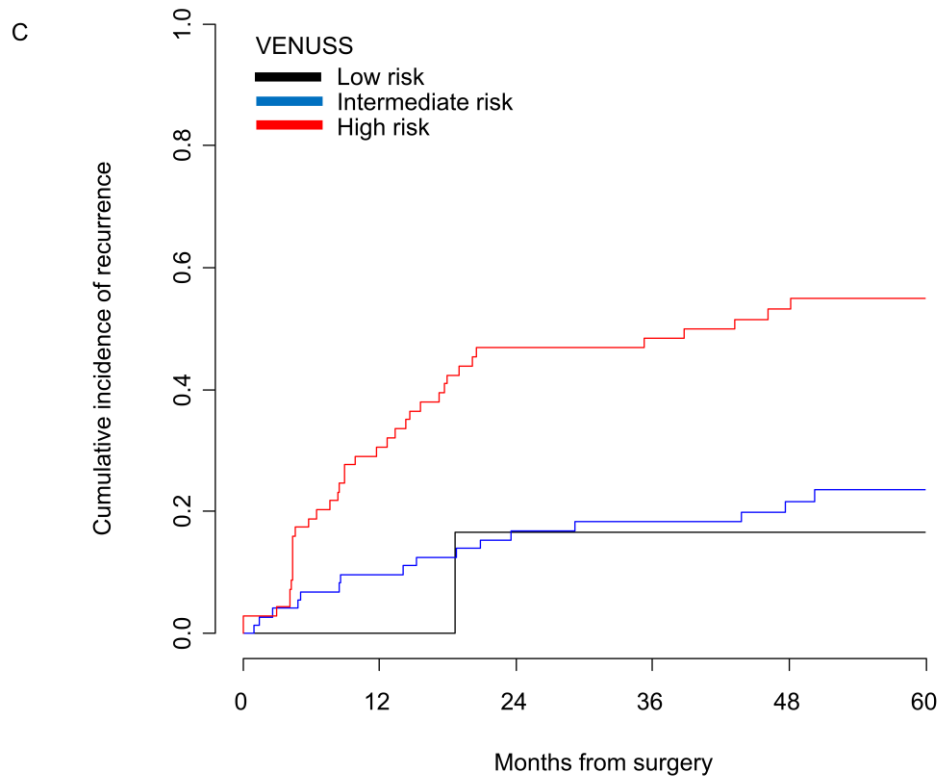

At risk

|                   |    |    |    |    |    |    |
|-------------------|----|----|----|----|----|----|
| Low risk          | 6  | 6  | 5  | 4  | 4  | 3  |
| Intermediate risk | 75 | 64 | 56 | 53 | 43 | 27 |
| High risk         | 69 | 46 | 35 | 33 | 26 | 17 |
